# Supplementary material for: Biomedical Applications of Microfluidic Devices: A Review
Source: Biosensors (Basel). 2022 Nov 16;12(11):1023. doi: 10.3390/bios12111023 (PMC9688231; doi:10.3390/bios12111023)
Supplement: Supplementary file 1 [file biosensors-12-01023-s001.zip › biosensors-1959643-supplementary.pdf]

|                                                                          |    |
|--------------------------------------------------------------------------|----|
| Abstract .....                                                           | 1  |
| 1. Introduction .....                                                    | 1  |
| 2. Microfluidics .....                                                   | 2  |
| 2.1. <i>Passive Microfluidics</i> .....                                  | 2  |
| 2.1.1. Inertial Micromixers .....                                        | 2  |
| 2.1.2. Sorting, Separation, and Isolation .....                          | 3  |
| a. Microfiltration .....                                                 | 3  |
| b. Inertial Focusing and Secondary Flows .....                           | 3  |
| c. Deterministic Lateral Displacement .....                              | 5  |
| d. Pinch Flow Fractionation .....                                        | 6  |
| 2.1.3. Droplet Microfluidics .....                                       | 6  |
| a. Microfluidic-Based Materials Production .....                         | 7  |
| 2.2. <i>Active Microfluidic Devices</i> .....                            | 8  |
| 2.2.1. Dynamic Micromixers .....                                         | 9  |
| a. Acoustic Field-Driven Micromixers .....                               | 10 |
| b. Electric Field-Driven Micromixers .....                               | 11 |
| c. Magnetic Field-Driven Micromixers .....                               | 11 |
| d. Thermal Field Micromixers .....                                       | 12 |
| e. Pressure Field Micromixers .....                                      | 12 |
| 2.2.2. Particle Separation .....                                         | 12 |
| 2.2.3. Focusing, Sorting, And Enrichment .....                           | 14 |
| 2.2.4. Particle Trapping .....                                           | 14 |
| 2.3. <i>Summary of Passive and Active Methods in Microfluidics</i> ..... | 15 |
| 3. Fabrication of Microfluidic Devices .....                             | 16 |
| 3.1. <i>Molding</i> .....                                                | 16 |
| 3.1.1. Replica Molding .....                                             | 16 |
| 3.1.2. Injection Molding .....                                           | 17 |
| 3.1.3. Hot Embossing .....                                               | 17 |
| 3.2. <i>3D Printing</i> .....                                            | 17 |
| 3.2.1. Fused Deposition Modeling .....                                   | 17 |
| 3.2.2. Vat Polymerization .....                                          | 18 |
| 3.2.3. Multi-Jet Printing .....                                          | 18 |
| 3.2.4. Two-Photon Polymerization .....                                   | 18 |
| 3.3. <i>Other Fabrication Methods</i> .....                              | 18 |
| 3.3.1. Nanofabrication .....                                             | 18 |
| 3.3.2. Wet and Dry Etching .....                                         | 19 |

|                                                                               |    |
|-------------------------------------------------------------------------------|----|
| 3.4. <i>Summary of Fabrication of Microfluidic Devices</i> .....              | 19 |
| 4. Biomedical Applications .....                                              | 19 |
| 4.1. <i>Microfluidics in Diagnosis</i> .....                                  | 19 |
| 4.1.1. Cancer Detection .....                                                 | 19 |
| 4.1.2. Cardiovascular Disease Detection .....                                 | 21 |
| 4.1.3. Respiratory Infection Detection (SARS-Cov-2) .....                     | 22 |
| 4.2. <i>Drug Discovery and Delivery</i> .....                                 | 22 |
| 4.3. <i>Disease Modeling</i> .....                                            | 24 |
| 4.3.1. Cancer Modeling .....                                                  | 24 |
| 4.3.2. Neurological Disease Modeling .....                                    | 25 |
| 4.3.3. Pulmonary/Lung Disease Modeling .....                                  | 26 |
| 4.3.4. Liver Disease Modeling .....                                           | 26 |
| 4.4. <i>Tissue Engineering</i> .....                                          | 26 |
| 4.4.1. Replication of The Cellular Microenvironment .....                     | 27 |
| 4.4.2. Fabrication of Biomaterials .....                                      | 28 |
| 4.5. <i>Organ-on-a-Chip</i> .....                                             | 28 |
| 4.5.1. Gut-on-a-Chip .....                                                    | 28 |
| 4.5.2. Bone-on-a-Chip .....                                                   | 30 |
| 4.5.3. Liver-on-a-Chip .....                                                  | 31 |
| 4.5.4. Brain-on-a-Chip .....                                                  | 32 |
| 4.5.5. Heart-on-a-Chip .....                                                  | 33 |
| 4.5.6. Kidney-on-a-Chip .....                                                 | 33 |
| 4.5.7. Lung-on-a-Chip .....                                                   | 34 |
| 4.6. <i>Microfluidics Biosensors</i> .....                                    | 35 |
| 4.6.1. Enzyme-Based Microfluidic Biosensors .....                             | 36 |
| 4.6.2. Nanozymes-Based Microfluidic Biosensors .....                          | 38 |
| 4.6.3. Microfluidics in Antibody Based Biosensing .....                       | 39 |
| 4.7. <i>Artificial Cells</i> .....                                            | 40 |
| 4.8. <i>Microfluidics and Cryopreservation</i> .....                          | 40 |
| 4.9. <i>Summary of Biomedical Applications of Microfluidics Devices</i> ..... | 41 |
| 5. Conclusions .....                                                          | 41 |
